# Supplementary material for: Protein Kinase C Inhibitors Reduce SARS-CoV-2 Replication in Cultured Cells
Source: PubMed Central journal article supplement (PMC9603170; doi:10.1128/spectrum.01056-22), 2022-08-24

**Fig. S1. Chemical structures of PKC inhibitors.**

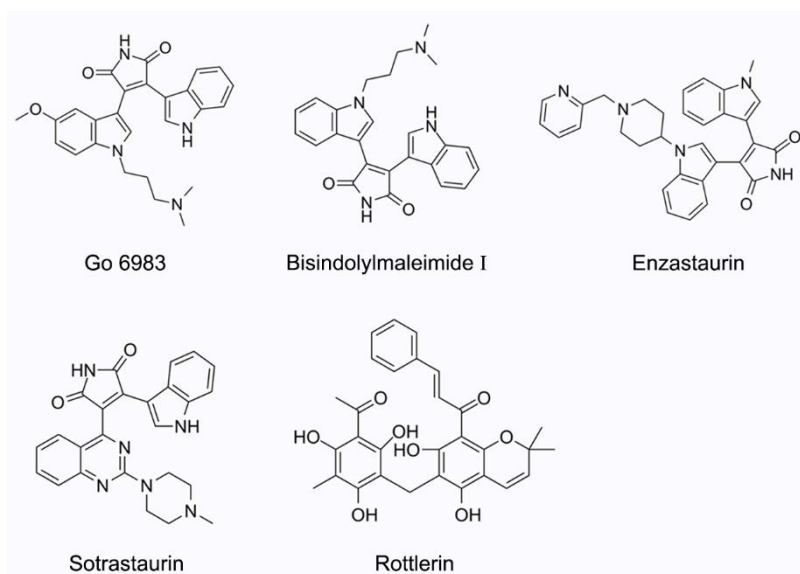

**Fig. S2. Effect of PKC inhibitors on the virus entry.** Cells were treated with DMSO, Go 6983, bisindolylmaleimide I, enzastaurin or sotrastaurin for 1 h, followed by pseudovirus infection. The luciferase activity of pseudovirus was measured at 16 h p.i. Data were presented as mean  $\pm$  standard deviation (SD) from three experiments. P values were calculated by ANOVA with Dunnett's multiple comparison test; \*\*\*\*p < 0.0001.

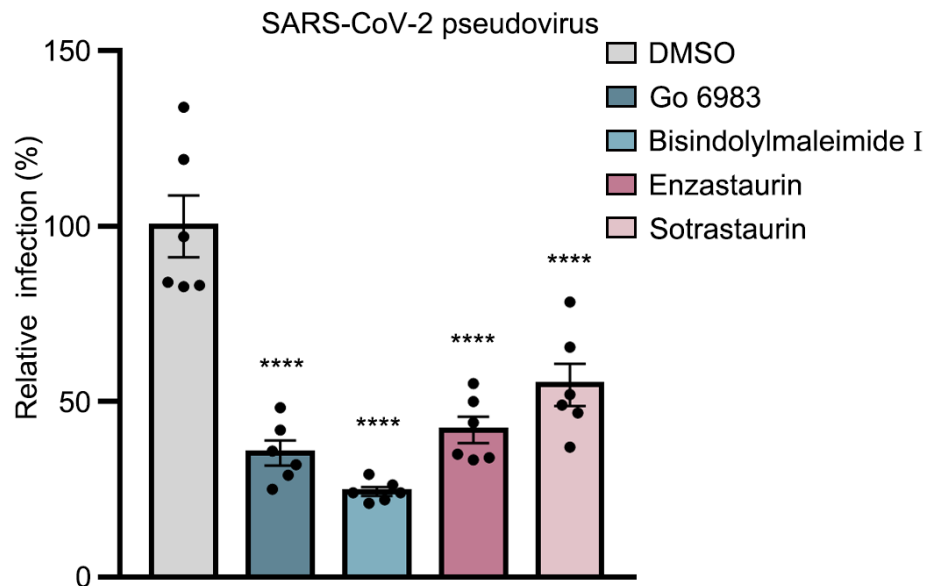

Supplement: spectrum.01056-22-s0001.pdf [file spectrum.01056-22-s0001.pdf]
